# Supplementary material for: Fabrication of an exfoliated graphitic carbon nitride as a highly active visible light photocatalyst
Source: Royal Society of Chemistry journal article supplement (doi:10.1039/c5ta08406g), 2015-01-01
Supplement: c5ta08406g1.pdf [file c5ta08406g1.pdf]

## Experiment

**Preparation of g-C<sub>3</sub>N<sub>4</sub> nanosheets.** The bulk g-C<sub>3</sub>N<sub>4</sub> was purchased from Carbodeon Ltd (Finland). The g-C<sub>3</sub>N<sub>4</sub> nanosheets were prepared by thermal treatment of purchased bulk g-C<sub>3</sub>N<sub>4</sub> under H<sub>2</sub> atmosphere. In detail, 30 mg of the bulk g-C<sub>3</sub>N<sub>4</sub> was placed in the center of a quartz circular tube and was heated at 400 °C for 4h with a ramp rate of 3°C/min under a H<sub>2</sub> flow of 40 mL min<sup>-1</sup>. The g-C<sub>3</sub>N<sub>4</sub> nanosheets were obtained as light yellow powder.

**Preparation of N-doped TiO<sub>2</sub>.** The N-doped TiO<sub>2</sub> was synthesized according to literature [1]. In detail, 3.6 g of TiO<sub>2</sub> powder was grounded with (NH<sub>4</sub>)<sub>2</sub>CO<sub>3</sub> (0.4 g), followed by heating at 200 °C with heating rate of 200 °C/h in air.

**Characterization.** Powder X-ray diffraction (XRD) patterns were obtained from a Bruker D8 Advanced diffraction-meter with Cu K $\alpha$  radiation with the scanning angle ranging from 10° to 60°. Transmission electron microscopy (TEM) images were acquired using JEOL JEM2100 microscopy at an acceleration voltage of 200kV. Atomic force microscopy (AFM) was performed on Thermo microscope auto probe CP research system. X-ray photoelectron spectra (XPS) were obtained on a RBD upgraded PHI-5000C ESCA system (Perkin Elmer) with Mg K $\alpha$  radiation (h $\nu$ =1253.6 eV). The Fourier transform infrared (FT-IR) experiment was carried out on a Nexus 870 spectrometer. <sup>13</sup>C and <sup>1</sup>H cross-polarisation magic angle spinning nuclear magnetic resonance spectra were recorded by a Bruker Avance 400 spectrometer at room temperature with a 4 mm triple resonance Bruker MAS probe spinning at 12 kHz, and the number of scan is 5000 and 32, recycle time is 8 and 0.5 s respectively. UV-vis diffuse reflectance spectroscopy was taken on a Hitachi U-3010 UV-vis spectrometer. Photoluminescence spectra (PL) were measured on a jobinYvon SPEX Fluorolog-3-P spectroscopy. Photocurrent was acquired on a CHI 660B electrochemical workstation in a standard three-electrode system under illumination using a 300 W Xe lamp. Time-resolved fluorescence decay spectra were performed by an Edinburgh FLSP920 spectrophotometer with the excitation wavelength at 340 nm and the emission wavelength at 460 nm.

**Photocatalytic activity measurement.** The photocatalytic activities of bulk g-C<sub>3</sub>N<sub>4</sub>

and g-C<sub>3</sub>N<sub>4</sub> nanosheets were tested by the degradation of methylene blue (MB) under visible light irradiation. In detail, 0.08 g catalyst was added into 200 mL of 10 mg L<sup>-1</sup> MB solution in a quartz tube reactor at 25 °C. The mixture was kept stirring in dark for 60 min to reach adsorption-desorption equilibrium before a 500 W Xe lamp was turned on. At given time intervals of irradiation, 2 mL of suspension was withdrawn, and then filtered to determine the residual concentration of MB solution spectrophotometrically at 664 nm.

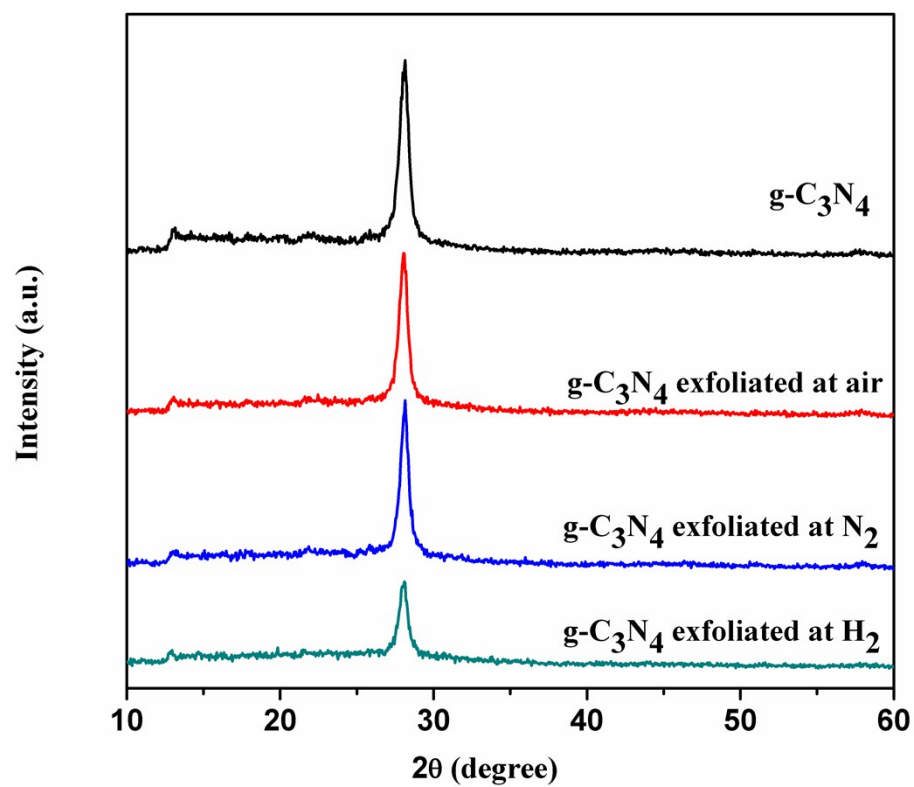

Fig S1 XRD patterns of bulk g-C<sub>3</sub>N<sub>4</sub> and g-C<sub>3</sub>N<sub>4</sub> exfoliated under air, N<sub>2</sub> and H<sub>2</sub> atmosphere.

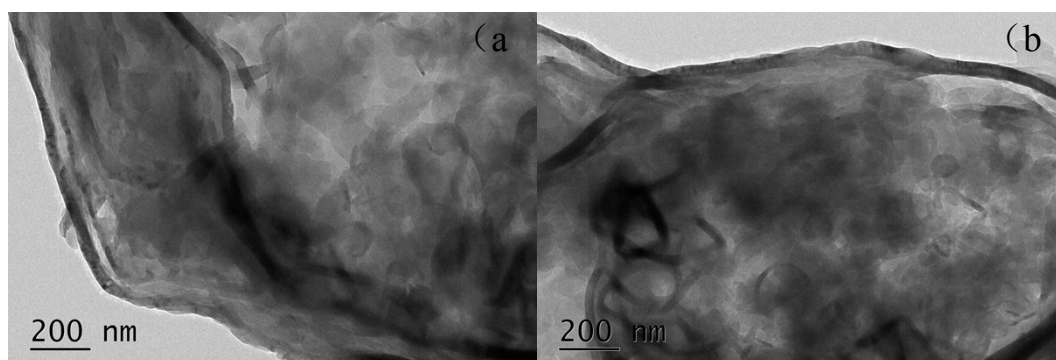

Fig S2 TEM images of g-C<sub>3</sub>N<sub>4</sub> exfoliated under (a) air and (b) N<sub>2</sub> atmosphere.

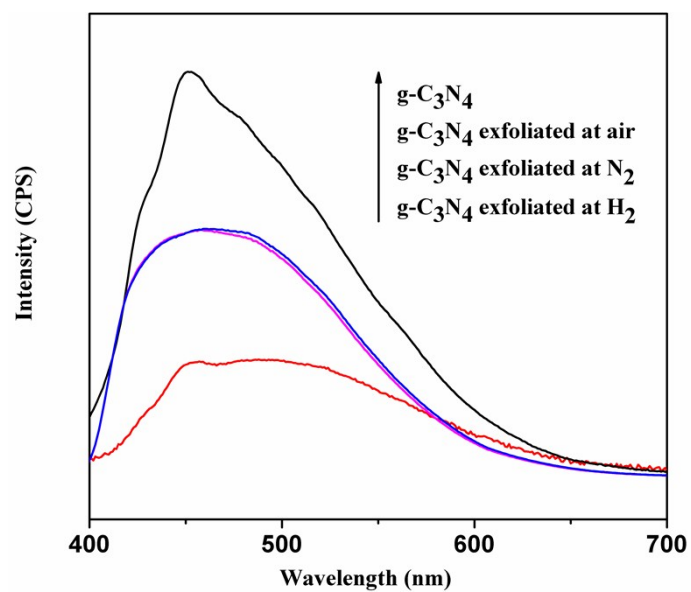

Fig S3 Photoluminescence (PL) spectra of bulk g-C<sub>3</sub>N<sub>4</sub> and g-C<sub>3</sub>N<sub>4</sub> exfoliated under air, N<sub>2</sub> and H<sub>2</sub> atmosphere.

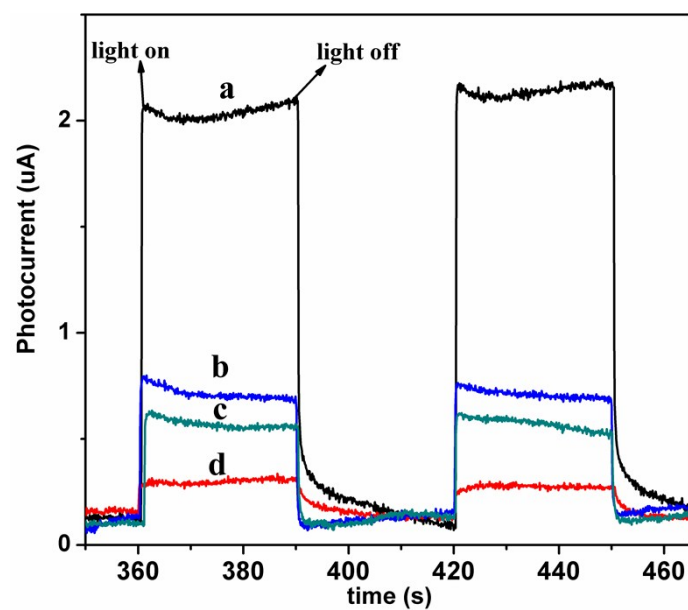

Fig S4 Transient photocurrent response of bulk g-C<sub>3</sub>N<sub>4</sub> and g-C<sub>3</sub>N<sub>4</sub> exfoliated under different atmosphere (a: g-C<sub>3</sub>N<sub>4</sub> exfoliated under H<sub>2</sub>, b: g-C<sub>3</sub>N<sub>4</sub> exfoliated under N<sub>2</sub>, c: g-C<sub>3</sub>N<sub>4</sub> exfoliated under air and d: bulk g-C<sub>3</sub>N<sub>4</sub>).

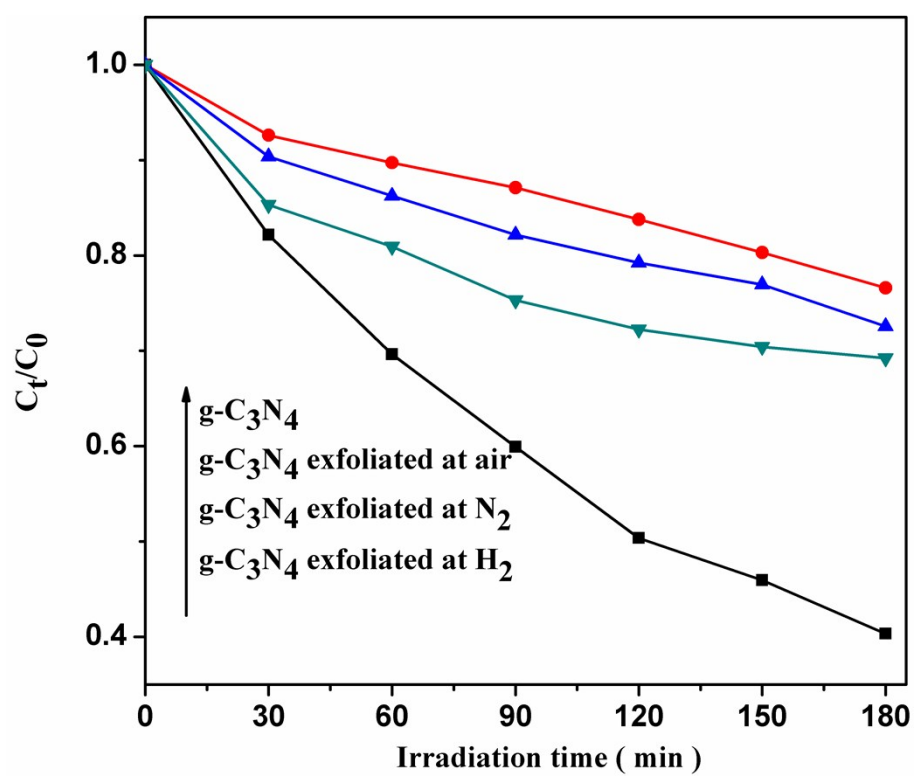

Fig S5 Photocatalytic degradation of MB over bulk g-C<sub>3</sub>N<sub>4</sub> and g-C<sub>3</sub>N<sub>4</sub> exfoliated under air, N<sub>2</sub> and H<sub>2</sub> atmosphere.

Table S1. C species content (mol %) of the samples based on XPS results.

| Photocatalyst                              | C=C   | C-NH <sub>2</sub> /C-NH | C=N   |
|--------------------------------------------|-------|-------------------------|-------|
| bulk g-C <sub>3</sub> N <sub>4</sub>       | 17.93 | 23.94                   | 58.13 |
| g-C <sub>3</sub> N <sub>4</sub> nanosheets | 7.56  | 14.83                   | 77.61 |

Table S2. C, N and H content (wt.%) of the samples according to elemental analysis.

| Photocatalyst                              | C wt.% | N wt.% | H wt.% | C/N<br>(molar ratio) | C/H<br>(molar ratio) |
|--------------------------------------------|--------|--------|--------|----------------------|----------------------|
| bulk g-C <sub>3</sub> N <sub>4</sub>       | 35.37  | 62.28  | 1.82   | 0.66                 | 1.63                 |
| g-C <sub>3</sub> N <sub>4</sub> nanosheets | 34.97  | 61.05  | 1.89   | 0.68                 | 1.54                 |



## Reference:

- [1] I. C. Kang, Q. Zhang, S. Yin, T. Sato and F. Saito, *Environ. Sci. Technol.*, 2008, **42**, 3622.
